# Supplementary material for: Scar prevention through topical delivery of gelatin-tyramine-siSPARC nanoplex loaded in dissolvable hyaluronic acid microneedle patch across skin barrier
Source: Royal Society of Chemistry journal article supplement (doi:10.1039/d2bm00572g), 2022-01-01
Supplement: d2bm00572g1.pdf [file d2bm00572g1.pdf]

## Supplementary Information

### Scar prevention through topical delivery of Gelatin-Tyramine-siSPARC nanoplex loaded in dissolvable hyaluronic acid microneedle patch across skin barrier

Yong Yao Chun,<sup>a</sup> William Wei Ren Tan,<sup>b</sup> Marcus Ivan Gerard Vos,<sup>b</sup> Wen Kiat Chan,<sup>a</sup> Hong Liang Tey,<sup>b,c,d</sup> Nguan Soon Tan<sup>b,e</sup> and Timothy Thatt Yang Tan<sup>\*a</sup>

a. School of Chemical and Biomedical Engineering, Nanyang Technological University, 62 Nanyang Dr, Singapore 637459.

b. Lee Kong Chian School of Medicine, Nanyang Technological University, 11 Mandalay Road, Singapore 308232.

c. National Skin Centre, 1 Mandalay Road, Singapore 308205.

d. Yong Loo Lin School of Medicine, National University of Singapore, 1E Kent Ridge Road, Singapore 119228.

e. School of Biological Sciences, Nanyang Technological University, 60 Nanyang Dr, Singapore 637551.

\*Corresponding author. E-mail address: [tytan@ntu.edu.sg](mailto:tytan@ntu.edu.sg)

## Supplementary Experimental Section

### RNA Extraction from Formalin-Fixed Paraffin-Embedded (FFPE) tissues and qPCR

Samples embedded in paraffin were extracted and processed via FFPE RNA Purification Kit (Norgen Biotek, Canada) as per the manufacturer's protocol<sup>1</sup>. Extracted RNAs were used for downstream qPCR similar like previously described in section 2.8 of the main manuscript using respective primers (Table S1) to validate SPARC gene silencing.

**Table S1.** Primers used for qPCR measurement of *In vivo* SPARC silencing study.

| Primer Name | Function | Sequence (5'-3')      |
|-------------|----------|-----------------------|
| SPARC       | Forward  | CGAGACTTTGAGAAGAACTAC |
|             | Reverse  | GGACAGGTACCCATCAATAG  |
| TBP         | Forward  | GCTGGTTATCGGGAGTTGG   |
|             | Reverse  | ACTGGCCTGGTGTCTAGAG   |

## Supplementary Figure

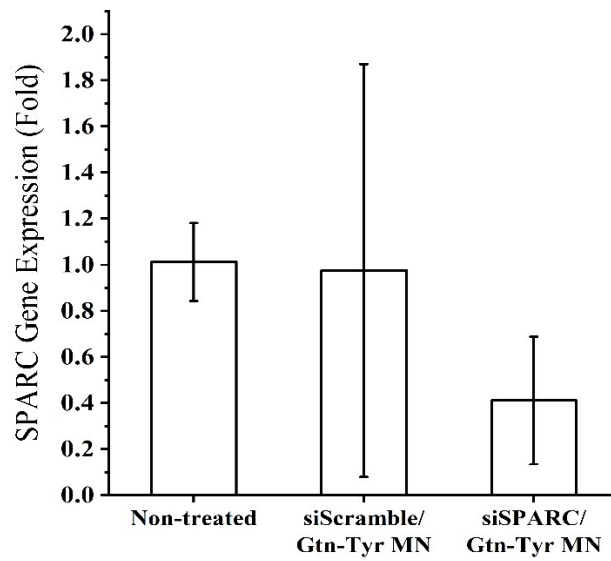

**Fig. S1.** Gene expression of SPARC normalized against non-treated wound and housekeeping gene TBP for the mice's skin wound treated with siScramble/Gtn-Tyr nanoplexes-loaded HA microneedle patch (siScramble/Gtn-Tyr MN) or siSPARC/Gtn-Tyr nanoplexes-loaded HA microneedle patch (siSPARC/Gtn-Tyr MN) at day 8.

## Reference

1. L. Li, B. J. W. Foo, K. W. Kwok, N. Sakamoto, H. Mukae, K. Izumikawa, S. Mandard, J.-P. Quenot, L. Lagrost and W. K. Teh, *MBio*, 2019, **10**.
