# Supplementary material for: Scar prevention through topical delivery of gelatin-tyramine-siSPARC nanoplex loaded in dissolvable hyaluronic acid microneedle patch across skin barrier
Source: Royal Society of Chemistry journal article supplement (doi:10.1039/d2bm00572g), 2022-01-01
Supplement: d2bm00572g2.xlsx [file d2bm00572g2.xlsx]

## Sheet: Sheet1
	Figure 2c													Figure 2d
	Descriptives													Descriptives
	FoldChange													FoldChange
		N	Mean	Std. Deviation	Std. Error	95% Confidence Interval for Mean		Minimum	Maximum						N	Mean	Std. Deviation	Std. Error	95% Confidence Interval for Mean		Minimum	Maximum
						Lower Bound	Upper Bound												Lower Bound	Upper Bound
	Non-treated	9	1.01778	0.195754	0.0652512	0.867308	1.16825	0.71	1.31					Non-treated	9	1	0.0460977	0.0153659	0.964566	1.03543	0.94	1.08
	Naked siSPARC	9	0.766667	0.217543	0.0725144	0.599448	0.933885	0.58	1.1					Naked siSPARC	9	0.851111	0.0834333	0.0278111	0.786979	0.915244	0.72	1.03
	siSPARC/Gtn-Tyr	9	0.528889	0.107987	0.0359955	0.445883	0.611895	0.35	0.67					siSPARC/Gtn-Tyr	9	0.663333	0.0877496	0.0292499	0.595883	0.730784	0.45	0.75
	Total	27	0.771111	0.267054	0.0513946	0.665468	0.876754	0.35	1.31					Total	27	0.838148	0.157701	0.0303495	0.775764	0.900532	0.45	1.08
	ANOVA													ANOVA
	FoldChange													FoldChange
		Sum of Squares	df	Mean Square	F	Sig.									Sum of Squares	df	Mean Square	F	Sig.
	Between Groups	1.07582	2	0.537911	16.5842	2.99685e-05								Between Groups	0.512319	2	0.256159	45.7806	6.43862e-09
	Within Groups	0.778444	24	0.0324352										Within Groups	0.134289	24	0.00559537
	Total	1.85427	26											Total	0.646607	26
	Multiple Comparisons													Multiple Comparisons
	FoldChange Tukey HSD													FoldChange Tukey HSD
	(I) Group	(J) Group	Mean Difference (I-J)	Std. Error	Sig.	95% Confidence Interval								(I) Group	(J) Group	Mean Difference (I-J)	Std. Error	Sig.	95% Confidence Interval
						Lower Bound	Upper Bound												Lower Bound	Upper Bound
	Non-treated	Naked siSPARC	0.251111	0.0848989	0.0181443	0.0390942	0.463128							Non-treated	Naked siSPARC	0.148889	0.0352621	0.000845895	0.0608293	0.236948
		siSPARC/Gtn-Tyr	0.488889	0.0848989	1.79532e-05	0.276872	0.700906								siSPARC/Gtn-Tyr	0.336667	0.0352621	8.68176e-09	0.248607	0.424726
	Naked siSPARC	Non-treated	-0.251111	0.0848989	0.0181443	-0.463128	-0.0390942							Naked siSPARC	Non-treated	-0.148889	0.0352621	0.000845895	-0.236948	-0.0608293
		siSPARC/Gtn-Tyr	0.237778	0.0848989	0.0258703	0.0257609	0.449795								siSPARC/Gtn-Tyr	0.187778	0.0352621	5.27475e-05	0.0997182	0.275837
	siSPARC/Gtn-Tyr	Non-treated	-0.488889	0.0848989	1.79532e-05	-0.700906	-0.276872							siSPARC/Gtn-Tyr	Non-treated	-0.336667	0.0352621	8.68176e-09	-0.424726	-0.248607
		Naked siSPARC	-0.237778	0.0848989	0.0258703	-0.449795	-0.0257609								Naked siSPARC	-0.187778	0.0352621	5.27475e-05	-0.275837	-0.0997182
